# Supplementary material for: Arabidopsis scaffold protein RACK1A interacts with diverse environmental stress and photosynthesis related proteins
Source: PubMed Central journal article supplement — Plant Signal Behav. 2013 Feb 22;8(5):e24012. doi: 10.4161/psb.24012 (PMC3906143; doi:10.4161/psb.24012), 2013-02-22
Supplement: psb-8-e24012-s01.pdf [file psb-8-e24012-s01.pdf]

## **Supplemental Material to:**

**Nabanita Kundu, Uvetta Dozier, Laurent Deslandes, Imre  
E. Somssich and Hemayet Ullah**

**Arabidopsis scaffold protein RACK1A interacts  
with diverse environmental stress  
and photosynthesis related proteins**

**Plant Signaling & Behavior 2013; 8(5)  
<http://dx.doi.org/10.4161/psb.24012>**

**[www.landesbioscience.com/journals/psb/article/24012](http://www.landesbioscience.com/journals/psb/article/24012)**

# Supplemental Fig.1

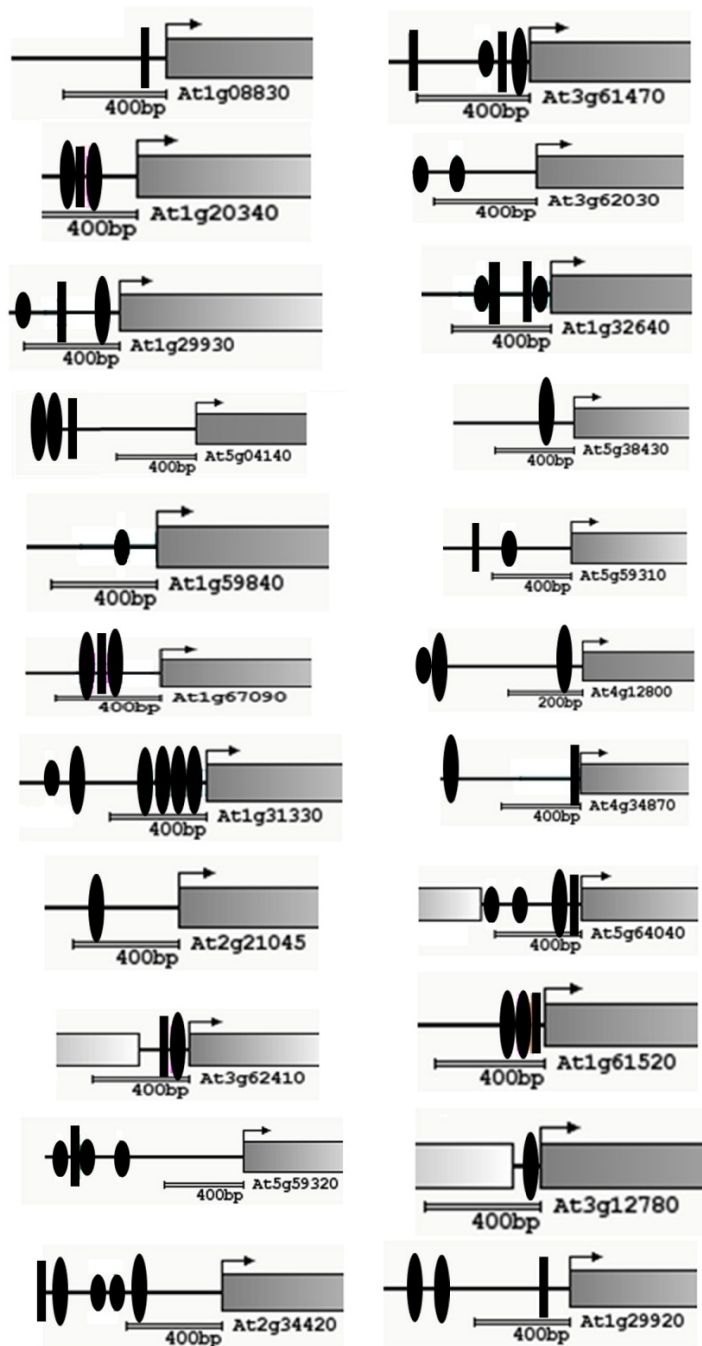

**Supplementary Table 1:** Complete list of Arabidopsis RACK1A interacting proteins identified through the use of RACK1A as bait screening an inflorescence cDNA library (Please see the Material and Methods section in the original text). A total 97 identified interacting proteins are categorized into different functional group based on the references found in the PubMed database. In cases where no known function is available, the references are omitted from those entries.

**Supplementary Figure 1:** Promoter regions of genes encoding RACK1A interacting proteins show distinct binding site motifs involved in the dehydration and light regulated pathways. The transcription factor binding site enrichment tool Athena [21] , was used to identify statistically over-represented Transcription Factor binding sites occurring in the selected set of 27 RACK1A interacting protein promoter sites. ABRE-like binding site motif ((C/G/T)ACGTG(G/T)(A/C)) known to occur in proteins that responses to dehydration and low temperature is found in 15 promoters with a p-value of  $<10^{-4}$  and shown in the figure as a dark vertical line. The Ibox promoter motif (GATAAG) [23] which is found in the promoters of light regulated genes has been found in all of the 16 RACK1A interacting photosynthetic genes and is represented by the long elliptical dark shapes. The high statistical p-value of  $<0.0040$  indicates the findings as significant. The MYB2AT site (TAACTG) known to be involved in the regulation of genes that are responsive to water-stress is present in 11 of the stress related proteins that interact with RACK1A protein. The statistical p-value for the result is 0.0137 and the site is represented by shorter elliptical dark shape [24] . The reference numbers refer to the references in the original text.

### Supplementary Table References:

- [1] F.R. Terras, S. Torrekens, F. Van Leuven, R.W. Osborn, J. Vanderleyden, B.P. Cammue, W.F. Broekaert, A new family of basic cysteine-rich plant antifungal proteins from Brassicaceae species, *FEBS. letters*, 316 (1993) 233-240.
- [2] C.J. Rivard, L.M. Brown, N.E. Almeida, A.B. Maunsbach, K. Pihakaski-Maunsbach, A. Andres-Hernando, J.M. Capasso, T. Berl, Expression of the calcium-binding protein S100A4 is markedly up-regulated by osmotic stress and is involved in the renal osmoadaptive response, *J. biol. Chem.* 282 (2007) 6644-6652.
- [3] O.D. Cordeiro, T.S. Silva, R.N. Alves, B. Costas, T. Wulff, N. Richard, M. de Vareilles, L.E. Conceicao, P.M. Rodrigues, Changes in Liver Proteome Expression of Senegalese Sole (*Solea senegalensis*) in Response to Repeated Handling Stress, *Mar. biotechnol.* 14 (2012) 714-729.
- [4] F. Maghuly, E.G. Borroto-Fernandez, M.A. Khan, A. Herndl, G. Marzban, M. Laimer, Expression of calmodulin and lipid transfer protein genes in *Prunus incisa x serrula* under different stress conditions, *Tree. physiol.*, 29 (2009) 437-444.
- [5] K. Shinozaki, K. Yamaguchi-Shinozaki, M. Seki, Regulatory network of gene expression in the drought and cold stress responses, *Curr. Plant Biol.* 6 (2003) 410-417.
- [6] B. Dombrecht, G.P. Xue, S.J. Sprague, J.A. Kirkegaard, J.J. Ross, J.B. Reid, G.P. Fitt, N. Sewelam, P.M. Schenk, J.M. Manners, K. Kazan, MYC2 differentially modulates diverse jasmonate-dependent functions in *Arabidopsis*, *Plant. Cell.* 19 (2007) 2225-2245.
- [7] M. Laxa, J. Konig, K.J. Dietz, A. Kandlbinder, Role of the cysteine residues in *Arabidopsis thaliana* cyclophilin CYP20-3 in peptidyl-prolyl cis-trans isomerase and redox-related functions, *The Biochem. J.S* 401 (2007) 287-297.
- [8] P. Xu, Y. Xiang, H. Zhu, H. Xu, Z. Zhang, C. Zhang, L. Zhang, Z. Ma, Wheat cryptochromes: subcellular localization and involvement in photomorphogenesis and osmotic stress responses, *Plant. Physiol.* 149 (2009) 760-774.
- [9] E. Peter, M. Rothbart, M.L. Oelze, N. Shalygo, K.J. Dietz, B. Grimm, Mg protoporphyrin monomethylester cyclase deficiency and effects on tetrapyrrole metabolism in different light conditions, *Plant. Cell. Physiol.* 51 (2010) 1229-1241.
- [10] M.J. Chrispeels, J.S. Greenwood, Heat stress enhances phytohemagglutinin synthesis but inhibits its transport out of the endoplasmic reticulum, *Plant. Physiol.* 83 (1987) 778-784.
- [11] M. Purev, M.K. Kim, N. Samdan, D.C. Yang, [Isolation of a novel fructose-1,6-bisphosphate aldolase gene from *Codonopsis lanceolata* and analysis of the response of this gene to abiotic stresses], *Mol. Biol.* 42 (2008) 206-213.
- [12] S. Szpryngiel, C. Ge, I. Iakovleva, A. Georgiev, J. Lind, A. Wieslander, L. Maler, Lipid interacting regions in phosphate stress glycosyltransferase atDGD2 from *Arabidopsis thaliana*, *Biochemistry.* 50 (2011) 4451-4466.
- [13] D. Bungard, B.J. Fuerth, P.Y. Zeng, B. Faubert, N.L. Maas, B. Viollet, D. Carling, C.B. Thompson, R.G. Jones, S.L. Berger, Signaling kinase AMPK activates stress-promoted transcription via histone H2B phosphorylation, *Science.* 329 (2010) 1201-1205.

- [14] R. Kissen, A.M. Bones, Nitrile-specifier proteins involved in glucosinolate hydrolysis in *Arabidopsis thaliana*, *J. Biol Chem.* 284 (2009) 12057-12070.
- [15] Y. Yoshiba, C. Aoki, S. Iuchi, T. Nanjo, M. Seki, F. Sekiguchi, K. Yamaguchi-Shinozaki, K. Shinozaki, Characterization of four extensin genes in *Arabidopsis thaliana* by differential gene expression under stress and non-stress conditions, *DNA. Res.* 8 (2001) 115-122.
- [16] D.T. Lampion, M.J. Kieliszewski, A.M. Showalter, Salt stress upregulates periplasmic arabinogalactan proteins: using salt stress to analyse AGP function, *New. Phytol.* 169 (2006) 479-492.
- [17] L.V. Bindschedler, M. Palmblad, R. Cramer, Hydroponic isotope labelling of entire plants (HILEP) for quantitative plant proteomics; an oxidative stress case study, *Phytochemistry.* 69 (2008) 1962-1972.
- [18] U. Ganeteg, A. Strand, P. Gustafsson, S. Jansson, The properties of the chlorophyll a/b-binding proteins Lhca2 and Lhca3 studied in vivo using antisense inhibition, *Plant. Physiol.* 127 (2001) 150-158.
- [19] E. Graciet, S. Lebreton, B. Gontero, Emergence of new regulatory mechanisms in the Benson-Calvin pathway via protein-protein interactions: a glyceraldehyde-3-phosphate dehydrogenase/CP12/phosphoribulokinase complex, *J. Eexp. Bot.* 55 (2004) 1245-1254.
- [20] I. Domonkos, P. Malec, A. Sallai, L. Kovacs, K. Itoh, G. Shen, B. Ughy, B. Bogos, I. Sakurai, M. Kis, K. Strzalka, H. Wada, S. Itoh, T. Farkas, Z. Gombos, Phosphatidylglycerol is essential for oligomerization of photosystem I reaction center, *Plant. Physiol.* 134 (2004) 1471-1478.
- [21] S. Juric, K. Hazler-Pilepic, A. Tomasic, H. Lepedus, B. Jelcic, S. Puthiyaveetil, T. Bionda, L. Vojta, J.F. Allen, E. Schleiff, H. Fulgosi, Tethering of ferredoxin:NADP+ oxidoreductase to thylakoid membranes is mediated by novel chloroplast protein TROL, *Plant. J. Cell. Mol. Biol.* 60 (2009) 783-794.
- [22] J.G. Jelesko, R. Harper, M. Furuya, W. Gruissem, Rare germinal unequal crossing-over leading to recombinant gene formation and gene duplication in *Arabidopsis thaliana*, *PNAS.* 96 (1999) 10302-10307.
- [23] C. Bengis, N. Belson, Subunit structure of chloroplast photosystem I reaction center, *The Journal of biological chemistry*, 252 (1977) 4564-4569.
- [24] J.D. Rochaix, Assembly of the photosynthetic apparatus, *Plant. Physiol.* 155 (2011) 1493-1500.
- [25] S.E. Clark, J.E. Oblong, G.K. Lamppa, Loss of efficient import and thylakoid insertion due to N- and C-terminal deletions in the light-harvesting chlorophyll a/b binding protein, *Plant. Cell.* 2 (1990) 173-184.
- [26] G.N. Johnson, Physiology of PSI cyclic electron transport in higher plants, *Biochimica. et. Biophysica. Acta.* 1807 (2011) 384-389.
- [27] C. Varotto, P. Pesaresi, P. Jahns, A. Lessnick, M. Tizzano, F. Schiavon, F. Salamini, D. Leister, Single and double knockouts of the genes for photosystem I subunits G, K, and H of *Arabidopsis*. Effects on photosystem I composition, photosynthetic electron flow, and state transitions, *Plant. Physiol.* 129 (2002) 616-624.
- [28] J. Grassl, A. Pruzinska, S. Hortensteiner, N.L. Taylor, A.H. Millar, Early Events in Plastid Protein Degradation in stay-green *Arabidopsis* Reveal Differential Regulation beyond the Retention of LHCII and Chlorophyll, *J. Proteome. Res.* 11 (2012) 5443-5452.

- [29] M. Grieco, M. Tikkanen, V. Paakkanen, S. Kangasjarvi, E.M. Aro, Steady-state phosphorylation of light-harvesting complex II proteins preserves Photosystem I under fluctuating white light, *Plant. Physiol.* (2012).
- [30] M.L. Falcone Ferreyra, A. Pezza, J. Biarc, A.L. Burlingame, P. Casati, Plant L10 ribosomal proteins have different roles during development and translation under ultraviolet-B stress, *Plant. Physiol.* 153 (2010) 1878-1894.
- [31] W. Weglohner, A.R. Subramanian, Multicopy GTPase center protein L12 of Arabidopsis chloroplast ribosome is encoded by a clustered nuclear gene family with the expressed members closely linked to tRNA(Pro) genes, *J.Biol. Chem.* 269 (1994) 7330-7336.
- [32] R.M. Mulligan, M.A. Williams, M.T. Shanahan, RNA editing site recognition in higher plant mitochondria, *J.Hered.* 90 (1999) 338-344.
- [33] S. Mokas, J.R. Mills, C. Garreau, M.J. Fournier, F. Robert, P. Arya, R.J. Kaufman, J. Pelletier, R. Mazroui, Uncoupling stress granule assembly and translation initiation inhibition, *Mol. Biol.Cell.* 20 (2009) 2673-2683.
- [34] M.A. Taylor, H.V. Davies, Nucleotide sequence of a cDNA clone for a 60S ribosomal protein L27 gene from potato (*Solanum tuberosum* L.), *Plant. Physiol.* 105 (1994) 1025-1026.
- [35] T. Nishiyama, H. Yamamoto, T. Uchiumi, N. Nakashima, Eukaryotic ribosomal protein RPS25 interacts with the conserved loop region in a dicistroviral intergenic internal ribosome entry site, *Nucleic. Acids. Res.* 35 (2007) 1514-1521.
- [36] P. Hemmerich, S. Bosbach, A. von Mikecz, U. Krawinkel, Human ribosomal protein L7 binds RNA with an alpha-helical arginine-rich and lysine-rich domain, *European journal of biochemistry / FEBS.* 245 (1997) 549-556.
- [37] H. Demirci, F.t. Murphy, R. Belardinelli, A.C. Kelley, V. Ramakrishnan, S.T. Gregory, A.E. Dahlberg, G. Jogl, Modification of 16S ribosomal RNA by the KsgA methyltransferase restructures the 30S subunit to optimize ribosome function, *RNA*, 16 (2010) 2319-2324.
- [38] H.J. Merianos, J. Wang, P.B. Moore, The structure of a ribosomal protein S8/spc operon mRNA complex, *RNA.* 10 (2004) 954-964.
- [39] M. Goyal, A. Alam, M.S. Iqbal, S. Dey, S. Bindu, C. Pal, A. Banerjee, S. Chakrabarti, U. Bandyopadhyay, Identification and molecular characterization of an Alba-family protein from human malaria parasite *Plasmodium falciparum*, *Nucleic acids research*, 40 (2012) 1174-1190.
- [40] P.E. Shaw, Peptidyl-prolyl isomerases: a new twist to transcription, *EMBO. R.* 3 (2002) 521-526.
- [41] N. Nesi, C. Jond, I. Debeaujon, M. Caboche, L. Lepiniec, The Arabidopsis TT2 gene encodes an R2R3 MYB domain protein that acts as a key determinant for proanthocyanidin accumulation in developing seed, *Plant. Cell.* 13 (2001) 2099-2114.
- [42] S.F. Gothel, M.A. Marahiel, Peptidyl-prolyl cis-trans isomerases, a superfamily of ubiquitous folding catalysts, *CMLS.* 55 (1999) 423-436.
- [43] C. Ringli, N. Baumberger, A. Diet, B. Frey, B. Keller, ACTIN2 is essential for bulge site selection and tip growth during root hair development of Arabidopsis, *Plant. Physiol.* 129 (2002) 1464-1472.

- [44] T.H. Lubben, A.A. Gatenby, G.K. Donaldson, G.H. Lorimer, P.V. Viitanen, Identification of a groES-like chaperonin in mitochondria that facilitates protein folding, *PNAS*. 87 (1990) 7683-7687.
- [45] R. Walden, H. Hayashi, H. Lubenow, I. Czaja, J. Schell, Auxin inducibility and developmental expression of *axi 1*: a gene directing auxin independent growth in tobacco protoplasts, *The EMBO.J.* 13 (1994) 4729-4736.
- [46] A. Iqbal, H. Arunlanantham, T. Brown, Jr., R. Chowdhury, I.J. Clifton, N.J. Kershaw, K.S. Hewitson, M.A. McDonough, C.J. Schofield, Crystallographic and mass spectrometric analyses of a tandem GNAT protein from the clavulanic acid biosynthesis pathway, *Proteins*. 78 (2010) 1398-1407.
- [47] N. Norais, D. Prome, J. Velours, ATP synthase of yeast mitochondria. Characterization of subunit d and sequence analysis of the structural gene *ATP7*, *J.Biol.Chem.* 266 (1991) 16541-16549.
- [48] Y.V. Liu, M.E. Hubbi, F. Pan, K.R. McDonald, M. Mansharamani, R.N. Cole, J.O. Liu, G.L. Semenza, Calcineurin promotes hypoxia-inducible factor 1alpha expression by dephosphorylating RACK1 and blocking RACK1 dimerization, *J.Biol.Chem.* 282 (2007) 37064-37073.
- [49] S. Purushothaman, G. Gupta, R. Srivastava, V.G. Ramu, A. Surolia, Ligand specificity of group I biotin protein ligase of *Mycobacterium tuberculosis*, *PloS. One.*, 3 (2008) e2320.
- [50] T. Hashimoto, Y. Yoshida, K. Tagawa, Regulatory proteins of F1F0-ATPase: role of ATPase inhibitor, *J.Bioenerg.Biomembr.* 22 (1990) 27-38.
- [51] M. Bennett, S. Michaud, J. Kingston, R. Reed, Protein components specifically associated with prespliceosome and spliceosome complexes, *Genes.Dev.* 6 (1992) 1986-2000.
- [52] M. Nakata, T. Shiono, Y. Watanabe, T. Satoh, Salt stress-induced dissociation from cells of a germin-like protein with Mn-SOD activity and an increase in its mRNA in a moss, *Barbula unguiculata*, *Plant.Cell. Physiol.* 43 (2002) 1568-1574.
- [53] K.F. Sullivan, J.C. Havercroft, P.S. Machlin, D.W. Cleveland, Sequence and expression of the chicken beta 5- and beta 4-tubulin genes define a pair of divergent beta-tubulins with complementary patterns of expression, *Mol.Cell. Biol.* 6 (1986) 4409-4418.
- [54] S.D. Kim, J.L. Liu, T. Roscioli, M.F. Buckley, G. Yagnik, S.A. Boyadjiev, J. Kim, Leucine-rich repeat, immunoglobulin-like and transmembrane domain 3 (LRIT3) is a modulator of FGFR1, *FEBS. Letters.* 586 (2012) 1516-1521.
- [55] H. Zhang, Y. Cao, J. Zhao, X. Li, J. Xiao, S. Wang, A pair of orthologs of a leucine-rich repeat receptor kinase-like disease resistance gene family regulates rice response to raised temperature, *BMC. Plant. Biol.* 11 (2011) 160.
- [56] M.K. Kandasamy, E.C. McKinney, R.B. Meagher, Differential sublocalization of actin variants within the nucleus, *Cytoskeleton.* 67 (2010) 729-743.
- [57] S.J. van Wijk, H.T. Timmers, The family of ubiquitin-conjugating enzymes (E2s): deciding between life and death of proteins, *FASEB. J.* 24 (2010) 981-993.
- [58] A.J. Chen, L. Gao, X.W. Wang, X.F. Zhao, J.X. Wang, SUMO conjugating enzyme E2 UBC9 mediates viral immediate-early protein SUMOylation in crayfish to facilitate reproduction of white spot syndrome virus, *J. virol.* (2012).

- [59] H. Wan, W. Yuan, Q. Ye, R. Wang, M. Ruan, Z. Li, G. Zhou, Z. Yao, J. Zhao, S. Liu, Y. Yang, Analysis of TIR- and non-TIR-NBS-LRR disease resistance gene analogous in pepper: characterization, genetic variation, functional divergence and expression patterns, *BMC. Genomics*. 13 (2012) 502.
- [60] C.W. Wang, S.C. Lee, The ubiquitin-like (UBX)-domain-containing protein Ubx2/Ubx8 regulates lipid droplet homeostasis, *J. cell. Sci.* 125 (2012) 2930-2939.
- [61] Y. Shi, M. Ghosh, G. Kovtunovych, D.R. Crooks, T.A. Rouault, Both human ferredoxins 1 and 2 and ferredoxin reductase are important for iron-sulfur cluster biogenesis, *Biochimica. et. Biophysica. Acta.* 1823 (2012) 484-492.
- [62] R. Bennett-Lovsey, S.E. Hart, H. Shirai, K. Mizuguchi, The SWIB and the MDM2 domains are homologous and share a common fold, *Bioinformatics*. 18 (2002) 626-630.
- [63] CC. Chen, YY. Chen, KC. Yeh, Effect of Cu content on the activity of Cu/ZnSOD1 in the Arabidopsis SUMO E3 ligase siz1 mutant. 6 (2011) 1428-30.



## Stress related proteins

| LOCUS NAME | NAME OF THE PROTEIN                                                   | FUNCTION                                     | REFERENCE |
|------------|-----------------------------------------------------------------------|----------------------------------------------|-----------|
| AT2G10940  | Bifunctional inhibitor/lipid-transfer protein/seed storage 2S         | Albumin-like protein<br>-antifungal activity | [1]       |
| AT1G18210  | Putative calcium-binding protein CML27                                | Stress response                              | [2]       |
| AT3G12780  | Phosphoglycerate kinase 1                                             | Oxidative stress response                    | [3]       |
| AT5G59310  | Non-specific lipid-transfer protein 4                                 | Stress response                              | [4]       |
| AT4G00870  | Transcription factor bHLH14                                           | Stress response                              | [5]       |
| AT1G32640  | Transcription factor MYC2                                             | Stress response                              | [6]       |
| AT4G34870  | Peptidyl-prolyl cis-trans isomerase CYP18-4                           | Stress response                              | [7]       |
| AT2G47590  | Photolyase/blue-light receptor 2,PHR3                                 | Osmotic stress                               | [8]       |
| AT3G56940  | Magnesium-protoporphyrin IX monomethyl ester [oxidative] cyclase,CRD1 | Stress<br>,photosynthesis                    | [9]       |
| AT3G07900  | O-fucosyltransferase-like protein                                     | heat stress                                  | [10]      |
| At2g01140  | Fructose-bisphosphate aldolase, class I [                             | Stress<br>response                           | [11]      |
| At5g59320  | Lipid transfer protein 3                                              | Stress<br>response                           | [4]       |
| At1g52420  | glycosyl transferase, putative; 4406-2038                             | Stress<br>response                           | [12]      |
| At1g07790  | histone H2B                                                           | Stress<br>response                           | [13]      |
| AT5G48180  | nitrile specifier protein 5                                           | Stress<br>response                           | [14]      |
| At5g52430  | ABA induced Hydroxy proline rich glycoprotein                         | Water stress<br>response                     | [15]      |
| At2g14890  | Arabinogalactan Protein 9 (AGP9)                                      | Salt stress                                  | [16]      |
| AT1G78370  | glutathione S-transferase TAU 20                                      | Stress response                              | [17]      |
| At1g78380  | glutathione S-transferase TAU 19                                      | Stress response                              | [17]      |
| AT1G08830  | Copper/Zinc Superoxide Dismutase 1, CSD1                              | Oxidative stress response                    | [63]      |

## Photosynthesis related proteins

| LOCUS NAME | NAME OF THE PROTEIN                                         | FUNCTION       | REFERENCE |
|------------|-------------------------------------------------------------|----------------|-----------|
| AT3G61470  | LHCA2, Photosystem I Light Harvesting Complex Gene 2        | Photosynthesis | [18]      |
| At1g61520  | LHCA3, Photosystem I Light Harvesting Complex Gene 3        | Photosynthesis | [18]      |
| At3g62410  | CP12, CP12 Domain Containing Protein 1 (Chloroplast stroma) | Photosynthesis | [19]      |
| AT5G64040  | Photosystem I reaction center subunit N, PSAN               | Photosynthesis | [20]      |
| AT2G21045  | Rhodanese-like domain-containing protein                    | Photosynthesis | [21]      |
| AT5G38430  | Ribulose bisphosphate carboxylase small chain 1B            | Photosynthesis | [22]      |
| AT1G31330  | Photosystem I reaction center subunit III,PSAF              | Photosynthesis | [23]      |
| AT1G59840  | Cofactor assembly of complex C                              | Photosynthesis | [24]      |
| At4g12800  | Photosystem I reaction center subunit XI                    | Photosynthesis | [23]      |
| AT1G29930  | Chlorophyll a/b binding protein1 (CAB1)                     | Photosynthesis | [25]      |
| AT1G55670  | photosystem I reaction center subunit v                     | Photosynthesis | [26]      |
| AT1G55670  | photosystem I subunit G; PSAG; PSI-G                        | Photosynthesis | [27]      |
| AT1G29910  | light-harvesting chlorophyll B-binding protein 3            | Photosynthesis | [28]      |
| At2g34430  | photosystem II light harvesting complex protein             | Photosynthesis | [29]      |

## Ribosomal proteins

| LOCUS NAME | NAME OF THE PROTEIN         | FUNCTION                     | REFERENCE |
|------------|-----------------------------|------------------------------|-----------|
| At4g09800  | Ribosomal RPS18C            | Ribosomal protein            | [30]      |
| At3g27830  | RPL12-A                     | Ribosomal protein            | [31]      |
| At1g15930  | RPS12A                      | 40S ribosomal protein<br>S12 | [32]      |
| AT2G19730  | 60S ribosomal protein L28-1 | Ribosomal protein            | [33]      |
| AT4G15000  | 60S ribosomal protein L27-3 | Ribosomal protein            | [34]      |

|           |                                           |                   |      |
|-----------|-------------------------------------------|-------------------|------|
| AT4G39200 | 40S ribosomal protein S25-4               | Ribosomal protein | [35] |
| AT2G44120 | 60S ribosomal protein L7-3                | Ribosomal protein | [36] |
| AT3G23390 | 60S ribosomal protein L36a                | Ribosomal protein | [36] |
| AT4G34620 | small subunit ribosomal protein 16, SSR16 | Ribosomal protein | [37] |
| AT5G06360 | Ribosomal protein S8e family protein      | Ribosomal protein | [38] |
| AT5G02960 | 40S ribosomal protein S23-2               | Ribosomal protein | [32] |
| AT1G09590 | 60S ribosomal protein L21-1               | Ribosomal protein | [36] |
| AT3G06700 | 60S ribosomal protein L29-1               | Ribosomal protein | [36] |

#### Other proteins

| LOCUS NAME | NAME OF THE PROTEIN                                          | FUNCTION                                    | REFERENCE     |
|------------|--------------------------------------------------------------|---------------------------------------------|---------------|
| AT5G23740  | RPS11-beta                                                   | Unknown                                     | Not available |
| At2g46000  | Unknown                                                      | Unknown                                     | Not available |
| AT5G11500  | Unknown protein with Domain of unknown function (DUF814)     | Unknown                                     | Not available |
| At1g20220  | Alba DNA/RNA binding protein (NP 564108.1)                   | Unknown                                     | [39]          |
| AT2G43560  | Peptidylprolyl isomerase                                     | Transcriptional regulation                  | [40]          |
| AT3G07565  | Uncharacterized protein                                      | Unknown                                     | Not available |
| AT3G01530  | myb domain protein 57                                        | Pigment                                     | [41]          |
| AT3G62030  | Prolyl cis-trans isomerase CYP20-3                           | Ubiquitination                              | [42]          |
| AT2G04900  | Uncharacterized protein                                      | Unknown                                     | Not available |
| AT3G18780  | Actin 2,ACT2                                                 | Root hair development                       | [43]          |
| AT1G23100  | GroES-like protein                                           | Protein folding                             | [44]          |
| AT2G44500  | Axi 1 protein-like protein                                   | Auxin action                                | [45]          |
| AT4G28030  | GCN5-related N-acetyltransferase (GNAT) family protein       | Histone acetyltransferases                  | [46]          |
| At3g52300  | ATP synthase subunit d                                       | ATP synthesis                               | [47]          |
| AT5G24780  | Vegetative storage protein 1                                 | Defense against herbivorous insects.        | [48]          |
| At5g35360  | Biotin carboxyl carrier protein precursor-like               | Fatty acid biosynthesis                     | [49]          |
| at1g59840  | HYPOTHETICAL PROTEIN                                         | Unknown                                     | Not available |
| AT5G04750  | Putative F1F0-ATPase inhibitor protein                       | ATPase inhibitor                            | [50]          |
| At2g18510  | Spliceosome associated protein                               | Splicing                                    | [51]          |
| At1g09250  | Hypothetical protein                                         | Unknown                                     | Not available |
| AT5G20630  | Germin like proteins (ABP1 or AtGER3)                        | Defense resistance against fungal pathogens | [52]          |
| AT5G44340  | tubulin beta-4 chain                                         | structural protein                          | [53]          |
| At4g20890  | tubulin beta-9 chain                                         | structural protein                          | [53]          |
| At1g20010  | tubulin beta-5 chain                                         | structural protein                          | [53]          |
| At5g44340  | tubulin beta                                                 | structural protein                          | [53]          |
| At5g23860  | tubulin beta-8 chain                                         | structural protein                          | [53]          |
| At1g08590  | leucine-rich repeat transmembrane protein kinase family prot | Modulator of growth factor                  | [54]          |
| At1g08590  | leucine-rich repeat protein kinase-like protein              | defense                                     | [55]          |
| At3g18780  | actin 2                                                      | Cell ultra structural protein               | [56]          |
| At1g49240  | actin 8                                                      | Cell ultra structural protein               | [56]          |
| At3g08690  | ubiquitin-conjugating enzyme E2 11                           | Ubiquitination                              | [57]          |
| At5g53300  | ubiquitin-conjugating enzyme E2 10                           | Ubiquitination                              | [57]          |
| At1g64230  | ubiquitin-conjugating enzyme E2 28                           | Ubiquitination                              | [57]          |
| At4g27960  | SUMO-conjugating enzyme UBC9                                 | Sumoylation                                 | [58]          |
| At2g16870  | TIR-NBS-LRR class disease resistance protein                 | defense                                     | [59]          |
| At2g30105  | ubiquitin-like domain-containing protein                     | lipid droplet homeostasis.                  | [60]          |
| At1g60950  | ferredoxin-2                                                 | iron sulfur cluster biogenesis              | [61]          |
| At2g18090  | SWIB/MDM2 domain-containing protein                          | chromatin remodeling                        | [62]          |
